# Supplementary material for: Multiplex lateral flow immunoassay for five antibiotics detection based on gold nanoparticle aggregations
Source: Royal Society of Chemistry journal article supplement (doi:10.1039/c5ra22583c), 2016-01-01
Supplement: c5ra22583c1.pdf [file c5ra22583c1.pdf]

## Supplementary Materials

### Captions:

**Table S1.** The UV-Vis spectrum of antibody–AuNP conjugates under different pH value by adding different volume of 0.1 M  $K_2CO_3$ .

**Table S2.** The chemical structures and  $IC_{50}$  of ELISA and strip of five compounds

**Table S3.** The semi-quantitative detection results of developed ICA in milk samples.

**Table S4.** The quantitative results of the spiked samples in the developed strip

**Table S1.** The UV-Vis spectrum of antibody–AuNP conjugates under different pH value

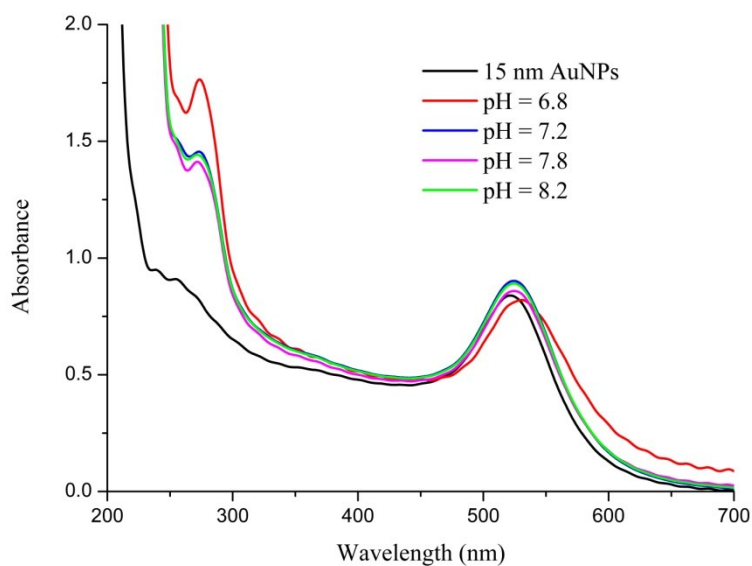

**Table S2.** The chemical structures and IC<sub>50</sub> of ELISA and strip of five compounds

| Compound | Structure                                                                           | IC <sub>50</sub> (ng/mL) |       |
|----------|-------------------------------------------------------------------------------------|--------------------------|-------|
|          |                                                                                     | ELISA                    | Strip |
| LIN      | 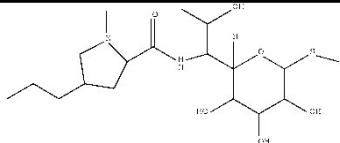   | 0.3                      | 2.5   |
| NEO      |    | 0.46                     | 15    |
| STR      |    | 0.41                     | 12    |
| KAN      |   | 0.07                     | 5     |
| GEN      |  | 0.09                     | 5     |

**Table S3.** The semi-quantitative detection results of developed ICA in milk samples.

| LIN/NEO/STR/KAN/GEN<br>Concentration (ng/mL) | Visual results of ICA (n=20) |        |        |        |        |
|----------------------------------------------|------------------------------|--------|--------|--------|--------|
|                                              | Test                         | Test   | Test   | Test   | Test   |
|                                              | line-1                       | line-2 | line-3 | line-4 | line-5 |
| 0/0/0/0/0                                    | + <sup>a</sup>               | +      | +      | +      | +      |
| 12.5/50/25/25/25                             | ± <sup>b</sup>               | ±      | ±      | ±      | ±      |
| 25/100/50/50/50                              | — <sup>c</sup>               | —      | —      | —      | —      |
| 50/200/100/100/100                           | —                            | —      | —      | —      | —      |

<sup>a</sup> The red band is obviously observed.

<sup>b</sup> Light red band is observed.

<sup>c</sup> No band is observed.

**Table S4.** The quantitative results of the spiked samples in the developed strip

| LIN/NEO/STR/KAN/GEN<br>Concentration (ng/mL) | Quantitative results by strip scan reader (n=20) |           |           |           |           |
|----------------------------------------------|--------------------------------------------------|-----------|-----------|-----------|-----------|
|                                              | Test                                             | Test      | Test      | Test      | Test      |
|                                              | line-1                                           | line-2    | line-3    | line-4    | line-5    |
| 0/0/0/0/0                                    | ND <sup>a</sup>                                  | ND        | ND        | ND        | ND        |
| 4/4/6/6/8                                    | 3.9±0.11 <sup>b</sup>                            | 3.7±0.03  | 6.1±0.08  | 5.7±0.21  | 8.1±0.47  |
| 8/8/12/12/24                                 | 6.9±0.36                                         | 9.2±0.41  | 13.7±0.05 | 14.6±1.03 | 22.5±0.04 |
| 12/12/24/24/72                               | 12.3±0.51                                        | 13.7±0.26 | 25.5±0.44 | 23.9±0.28 | 74.1±0.36 |

<sup>a</sup> Not detected.

<sup>b</sup> Mean value ± SD
